# Supplementary material
Source: Springer Nature journal article supplement (https://www.springermedizin.de/resource/supplementary/12937_2010_364_MOESM1_ESM.pdf/25653210)
Supplement: MOESM1 [file 25653210]

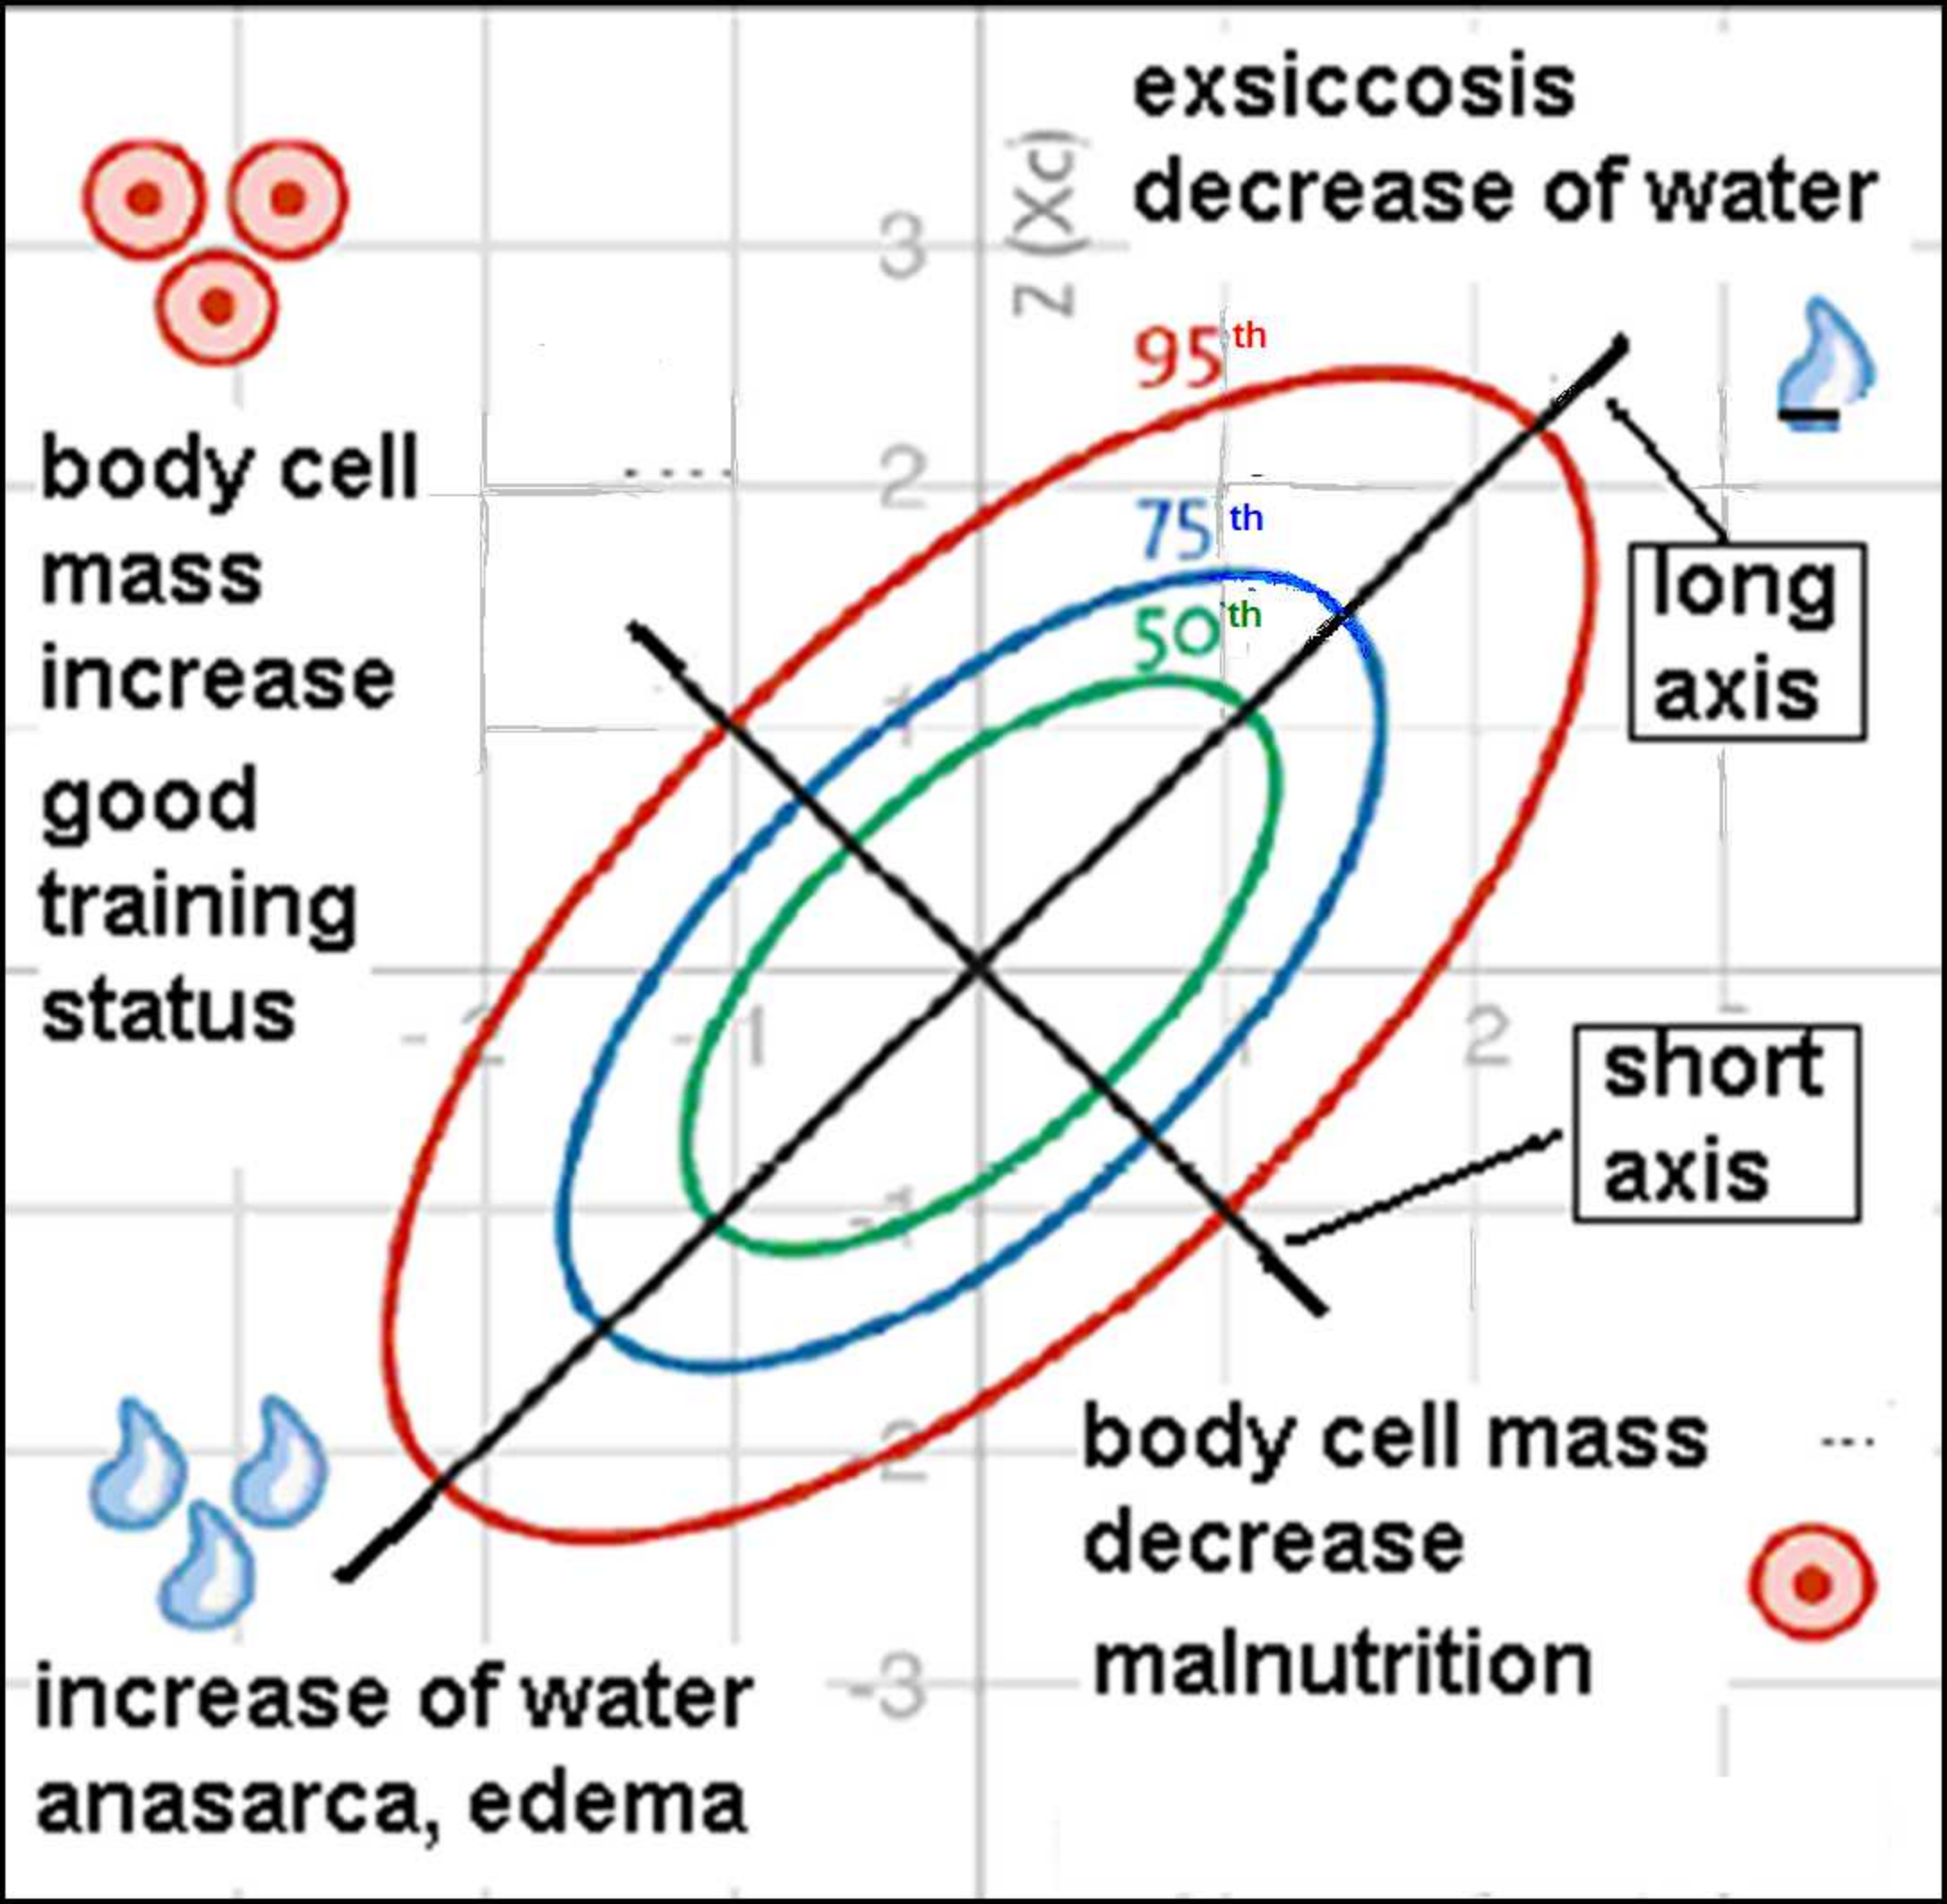

**exsiccosis**  
**decrease of water**

$Z(Xc)$

$95^{th}$

$75^{th}$

$50^{th}$

**long axis**

**short axis**

**body cell mass increase**  
**good training status**

**body cell mass decrease**  
**malnutrition**

**increase of water**  
**anasarca, edema**
